# Supplementary material
Source: publisher figshare collection journal article supplement (https://frontiersin.figshare.com/ndownloader/files/12866939)
Supplement: Supplementary file [file 12866939]

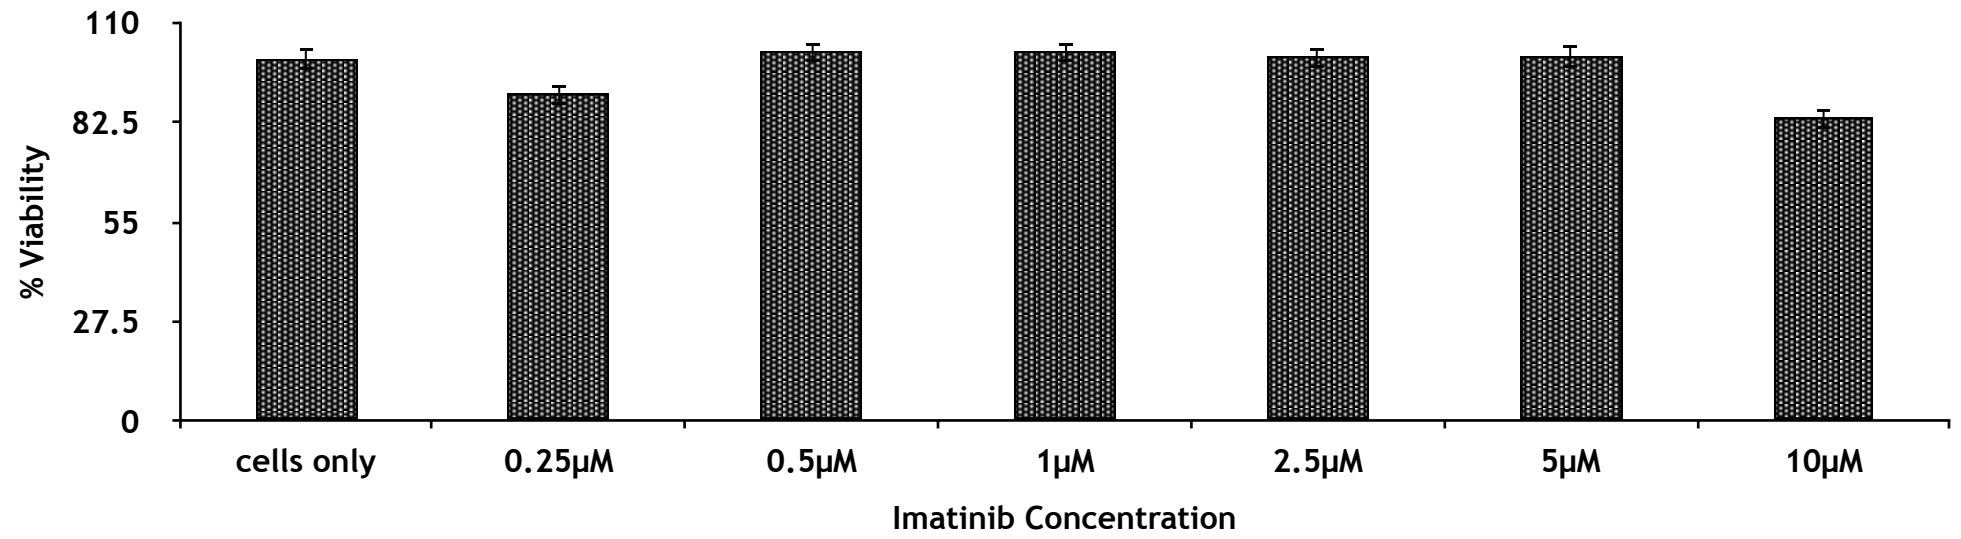

**Figure 1:** Graph showing cell viability with different concentration of Imatinib

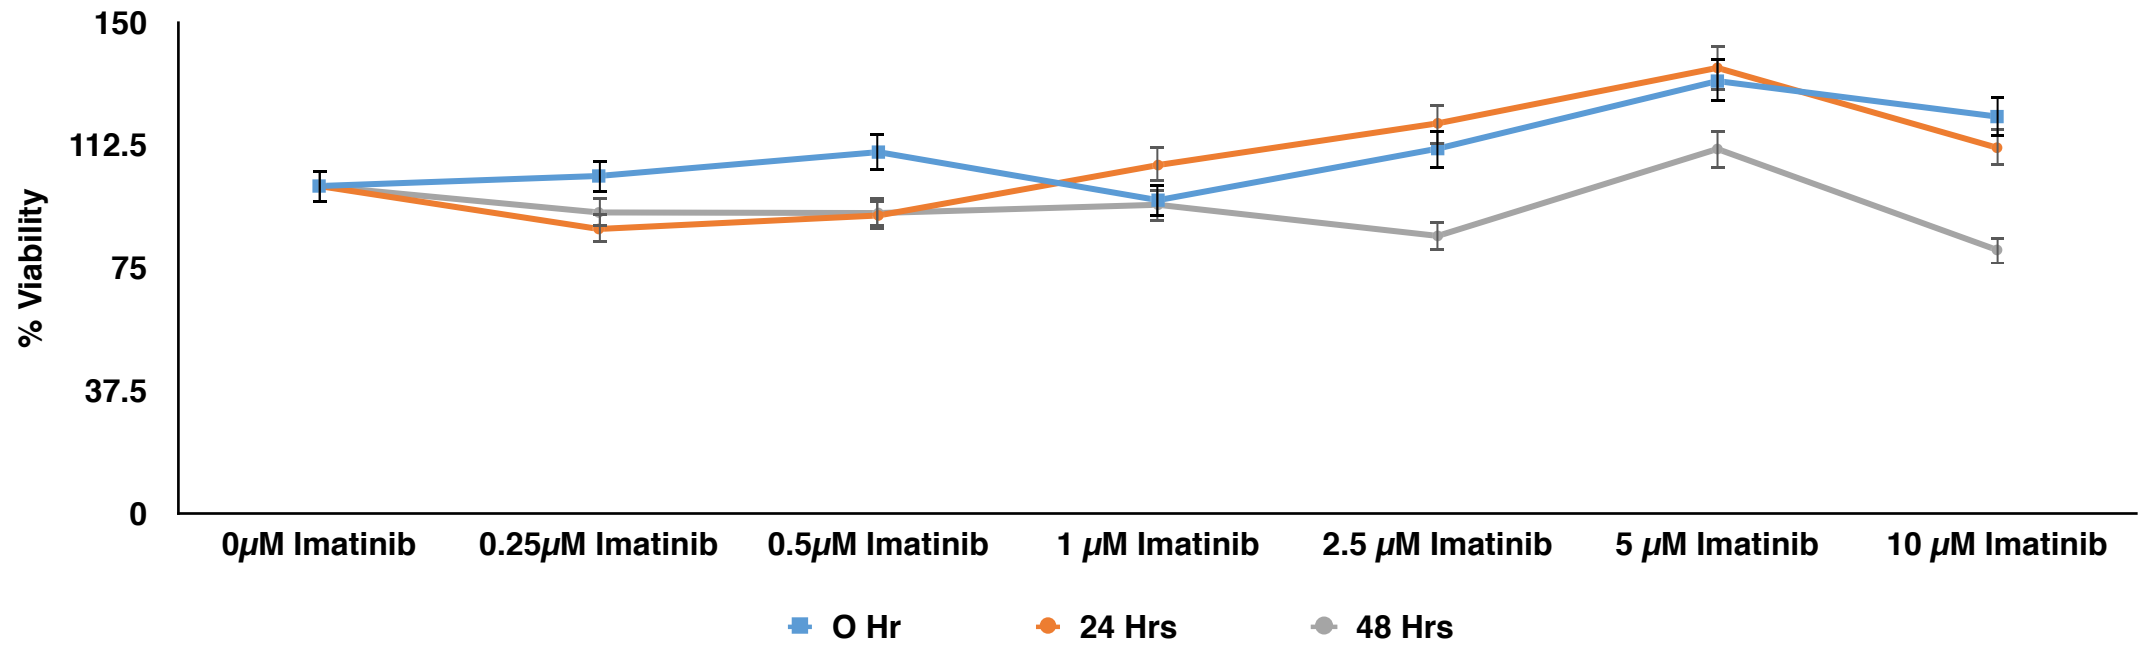

**Figure 2:** Graph showing cell viability assay at 0, 24h and 48h.

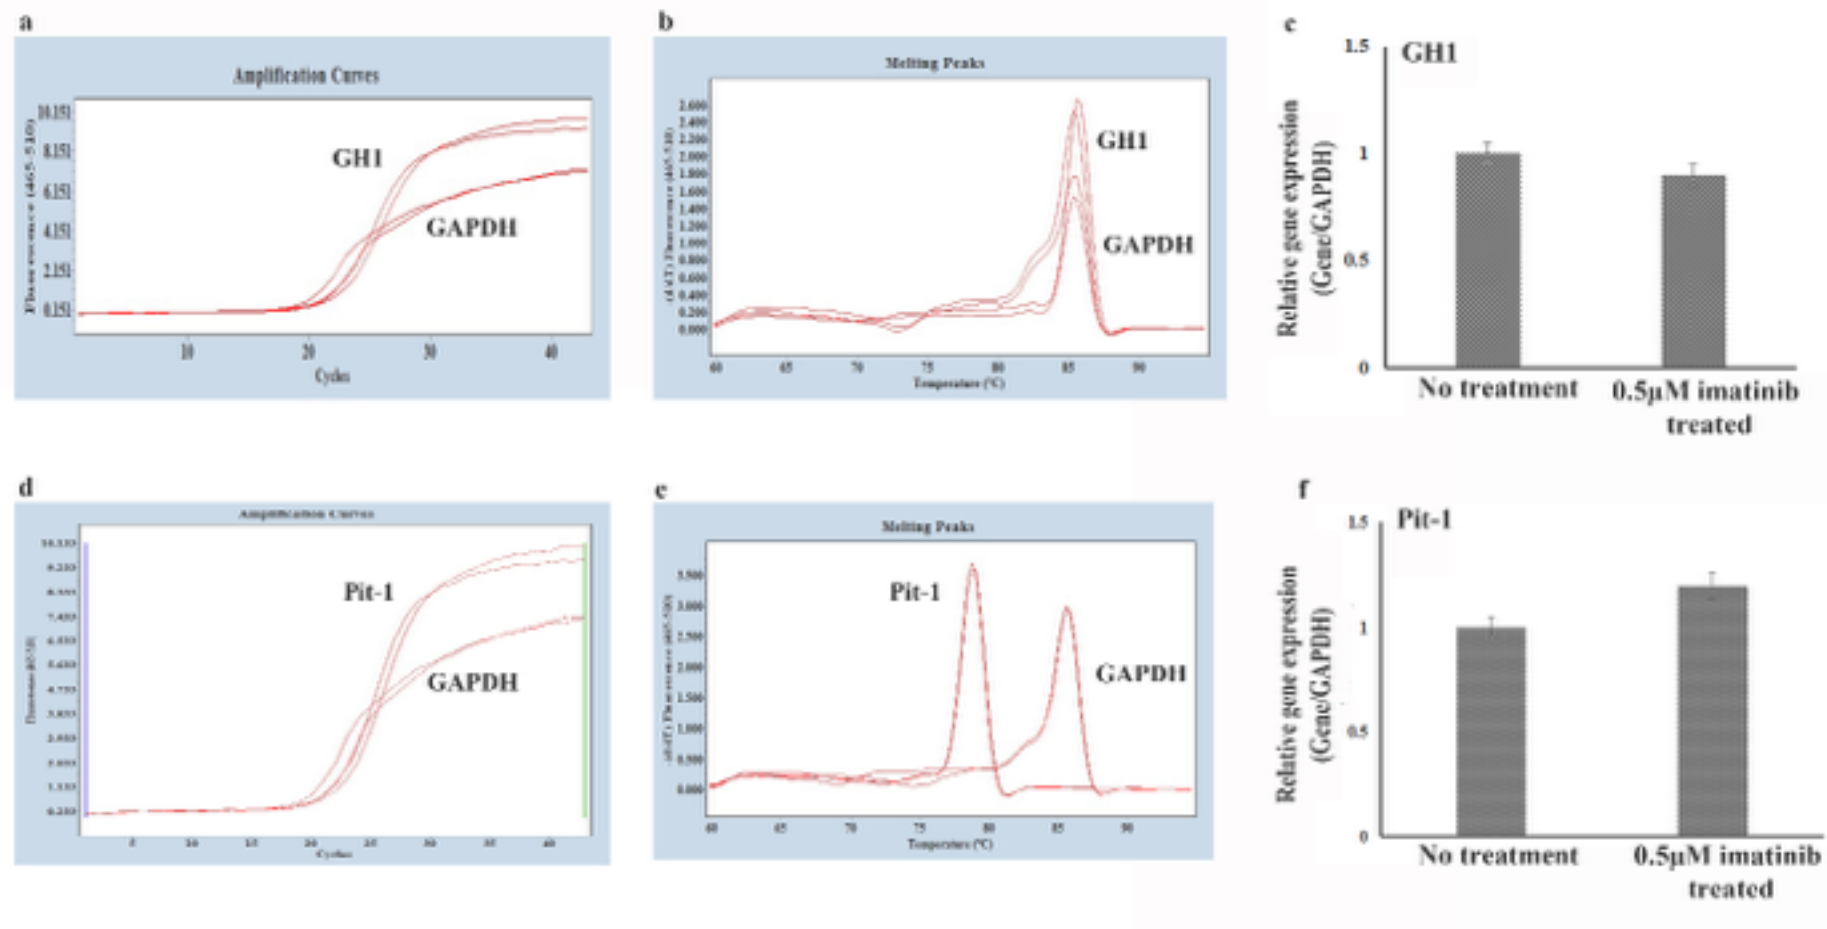

**Figure 3:** Real-time PCR analysis of effect of imatinib on *Pit-1* and *GH1* gene.

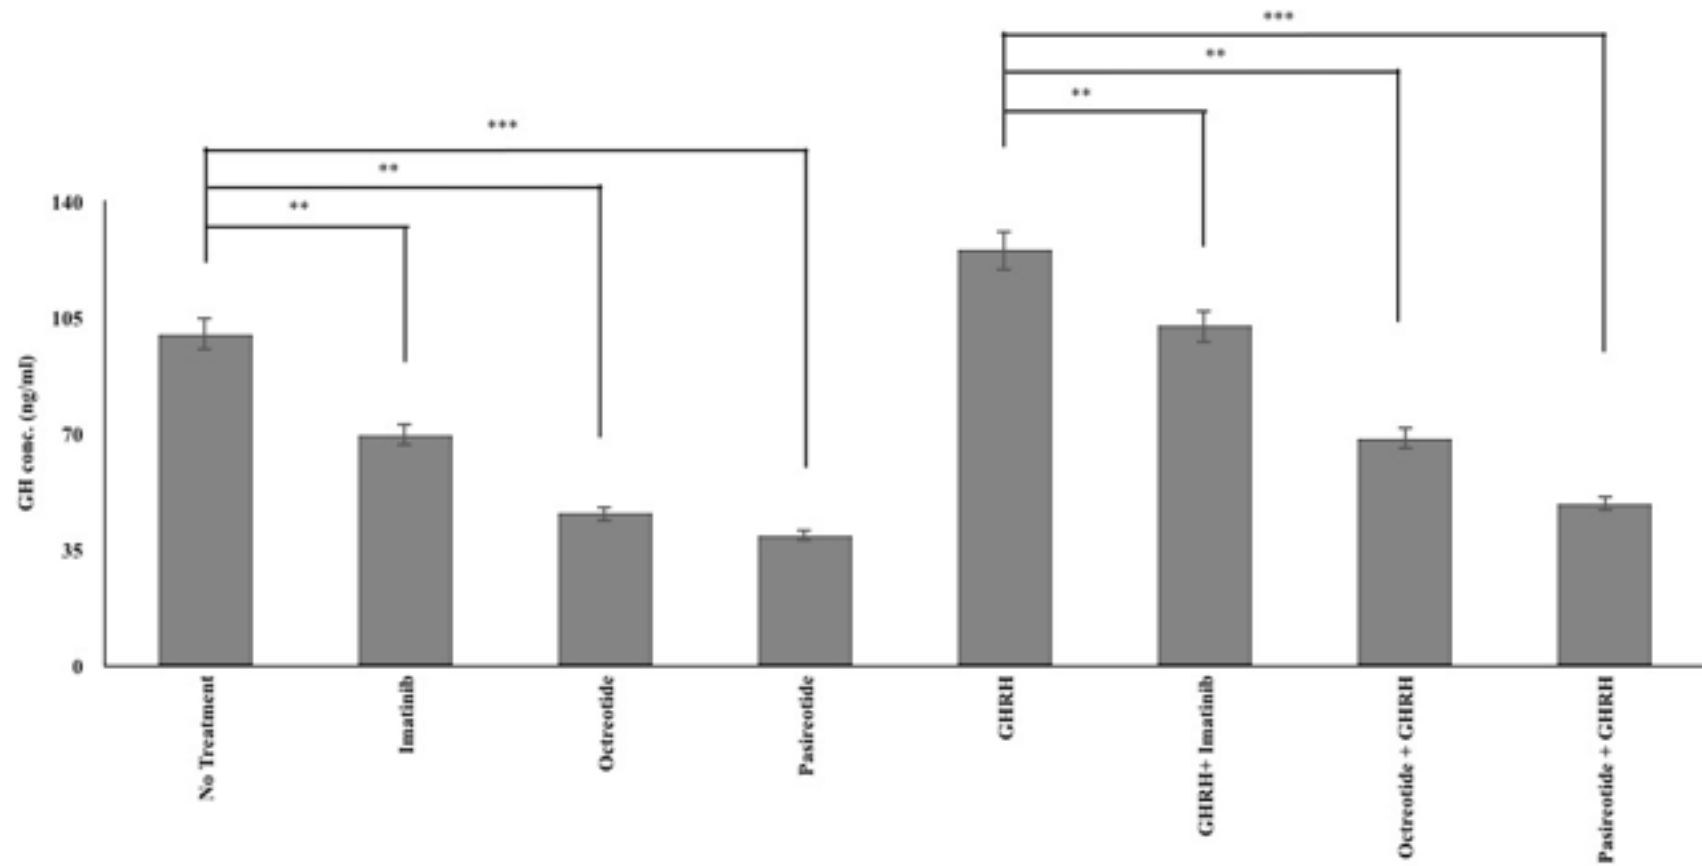

**Figure 4:** Graph showing effect of GH on cells treated with imatinib, octreotide, pasireotide and in combination with GHRH.

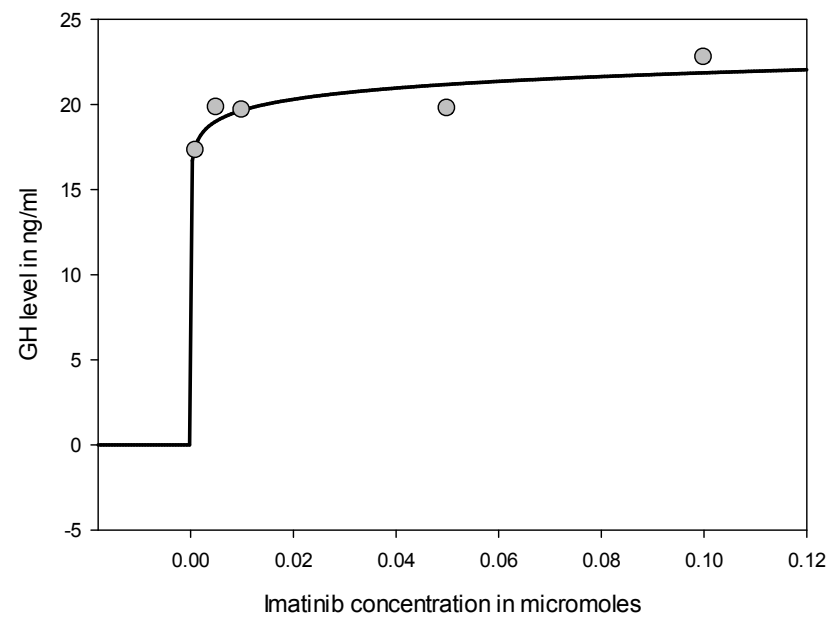

**Figure 5:** ED50 from imatinib treated cells. ED50 calculated from our experiment was 0.015  $\mu\text{M}$



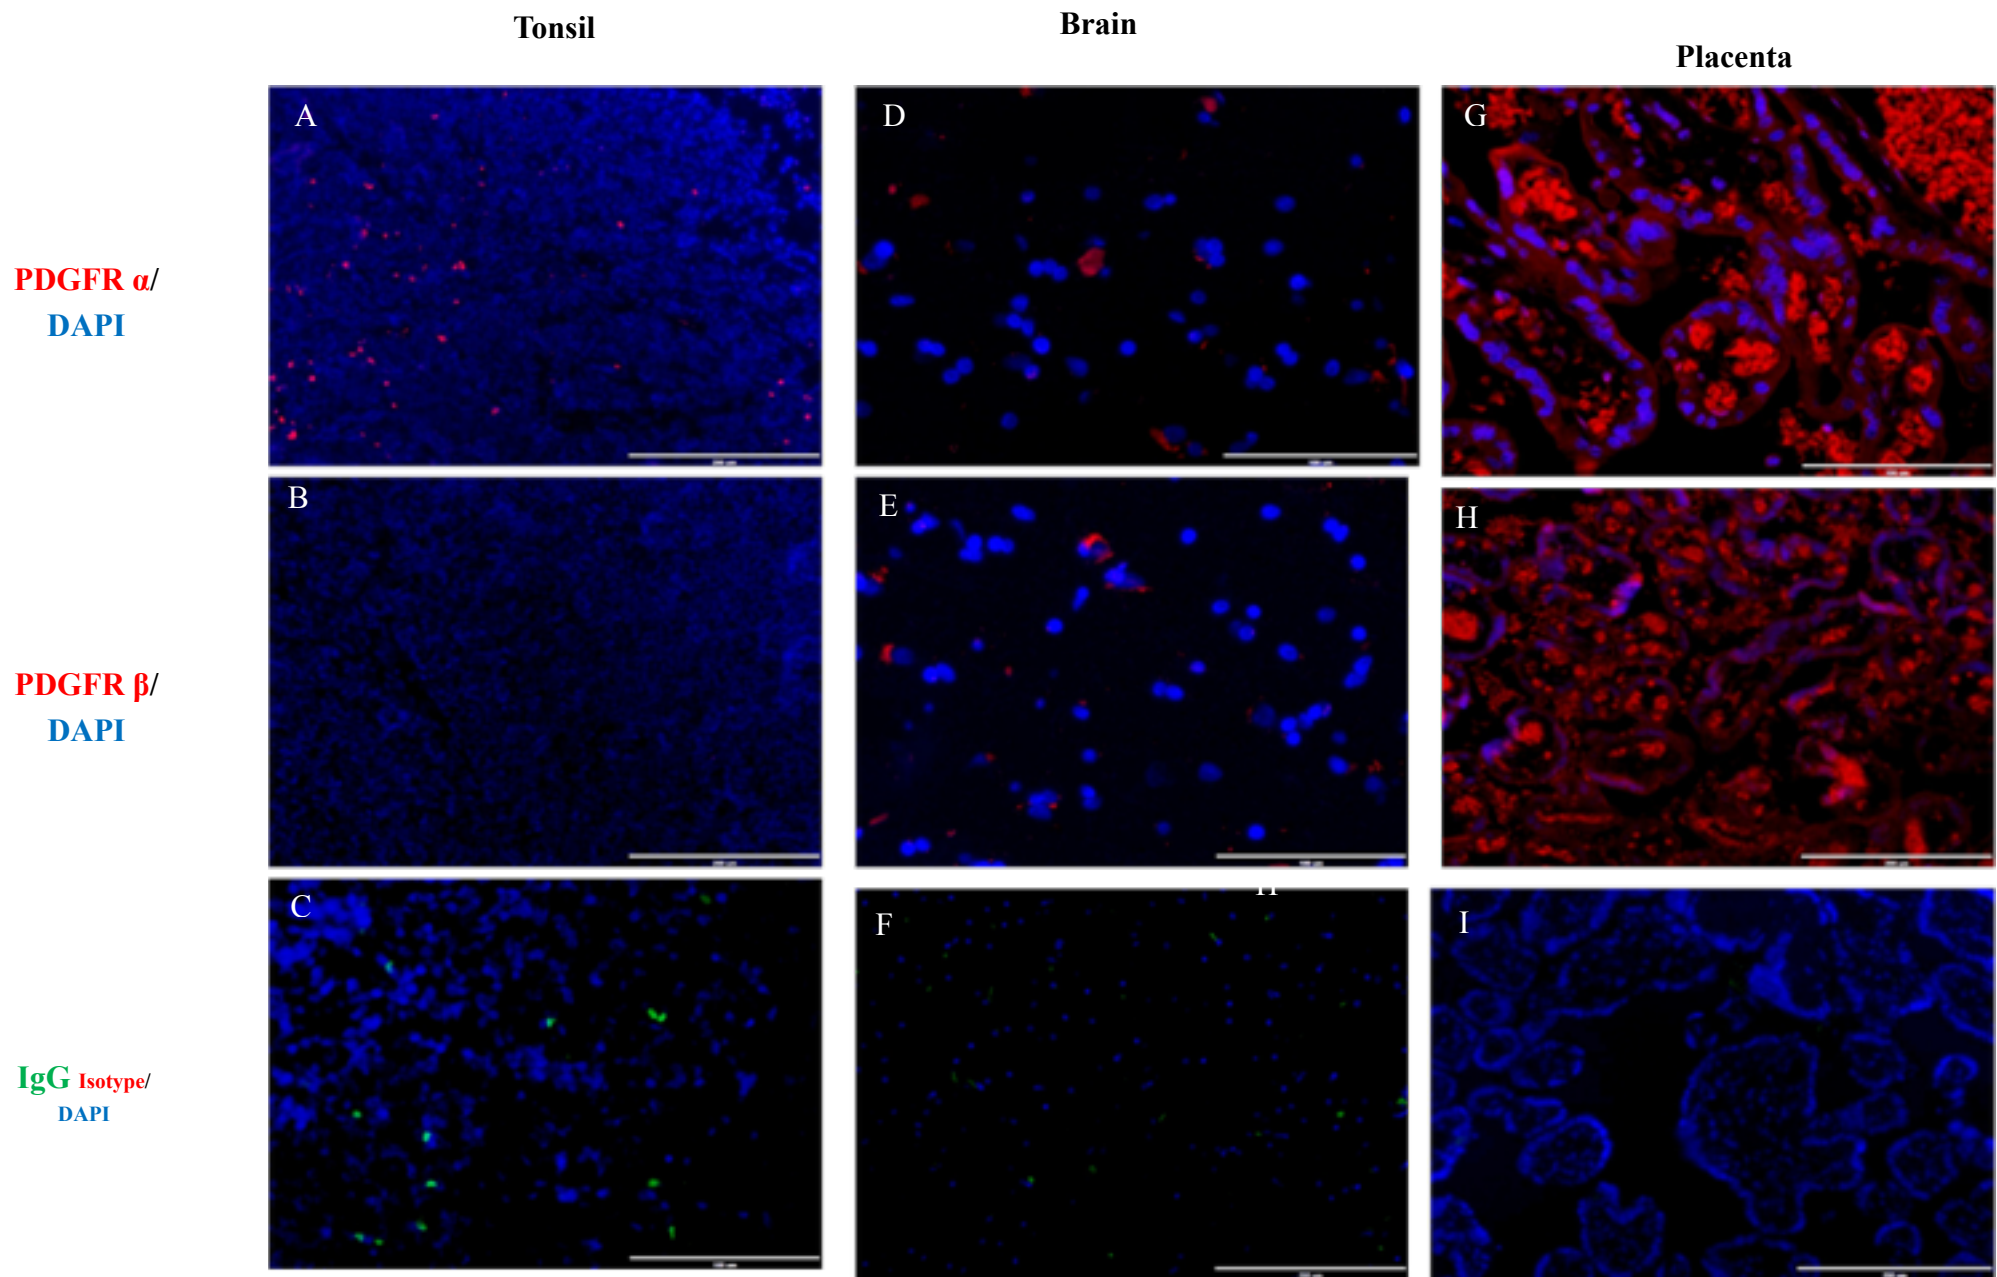

**Figure 6:** Controls for PDGFR $\alpha$ / $\beta$  Immunoflourescence. Immunoflourescence for negative (Tonsil A-C and Brain D-F) and positive (Placenta,G-I)

tissue controls verifies the specificity of the PDGFR $\alpha/\beta$  antibodies. Significant expression of PDGFR $\alpha/\beta$  is seen in placenta. Also, control staining of the sections with an isotype-matched control (C,F,I) antibody without the primary antibody.
